# Supplementary material
Source: HighWire-hosted journal article supplement (https://bmjopen.bmj.com/content/12/7/e061435)
Supplement: inline-supplementary-material-3 [file inline-supplementary-material-3.pdf]

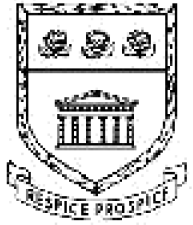

## UNIVERSITY OF THE WESTERN CAPE

Private Bag X 17, Bellville 7535, South Africa

Tel: +27 21-959 2653, Fax: 27 21-959 3686,

E-mail: [lleach@uwc.ac.za](mailto:lleach@uwc.ac.za)

### Findings and Analysis

| Author | Methods of Data Analysis | Study Findings | Author's Conclusions |
|--------|--------------------------|----------------|----------------------|
|        |                          |                |                      |
|        |                          |                |                      |
|        |                          |                |                      |
|        |                          |                |                      |
|        |                          |                |                      |
|        |                          |                |                      |
|        |                          |                |                      |
|        |                          |                |                      |
|        |                          |                |                      |
|        |                          |                |                      |
|        |                          |                |                      |
